# Supplementary material for: A clinical prediction model for outcome and therapy delivery in transplant-ineligible patients with myeloma (UK Myeloma Research Alliance Risk Profile): a development and validation study
Source: PubMed Central journal article supplement (PMC6391517; doi:10.1016/s2352-3026(18)30220-5), 2019-02-06
Supplement: mmc1.pdf [file mmc1.pdf]

# THE LANCET

## Haematology

### Supplementary appendix

This appendix formed part of the original submission and has been peer reviewed.  
We post it as supplied by the authors.

Supplement to: Cook G, Royle K-L, Pawlyn C, et al. A clinical prediction model for outcome and therapy delivery in transplant-ineligible patients with myeloma (UK Myeloma Research Alliance Risk Profile): a development and validation study. *Lancet Haematol* 2019; published online Feb 6. [http://dx.doi.org/10.1016/S2352-3026\(18\)30220-5](http://dx.doi.org/10.1016/S2352-3026(18)30220-5).

**Supplementary Appendix: A clinical prediction model for outcome and therapy delivery in transplant-ineligible patients with myeloma (UK Myeloma Research Alliance Risk Profile): a development and validation study**

**Contents**

Supplementary Methods..... 2

    Cytogenetic Profiling..... 2

    Imputation of missing data..... 2

    Use of the D-statistic..... 2

    Exploratory Analyses..... 2

Supplementary Figures..... 3

    Supplementary Figure 1: Combined calibration results at A) sixty days and B) one year..... 3

    Supplementary Figure 2: MRP Scoring Algorithm..... 4

    Supplementary Figure 3: The distributions of the MRP groups for the remaining Quality of Life subscales of the EORTC QLQ-C30 and QLQ-MY24 in MRC-IX at baseline. .... 5

    Supplementary Figure 4: Kaplan-Meier Curves for overall survival (OS) by the MRP groups in MRC-IX with A) Standard (n=169), B) High-Risk (n=120) cytogenetic profiles. Standard risk was defined as the absence of any of the risk lesions; t(4;14), t(14; 16), t(14;20), del(17p) and gain(1q), high-risk at least one risk lesion (UK definition). .... 7

    Supplementary Figure 5: Kaplan-Meier curves for overall survival by the MRP groups for the patients in MRC-IX with A) Standard (n=231), B) High-Risk (n=58) cytogenetic profiles and patients in NCRI-XI with C) Standard (n=598) and D) High-Risk (n=133). Standard risk was defined as the absence of any of the risk lesions; t(4;14), t(14;16), and del(17p) high-risk at least one risk lesion (IMWG definition)..... 8

Supplementary Tables ..... 10

    Supplementary Table 1: Distribution of each potential prognostic factor across the MRP groups in the training (NCRI-XI) and test (MRC-IX) datasets..... 10

    Supplementary Table 2: Logistic regression models for early mortality ..... 10

References ..... 11

## Supplementary Methods

### Cytogenetic Profiling

Diagnostic bone marrow samples were initially purified for plasma cells using CD138-based cell selection (Miltenyi Biotec, Bisley, UK).<sup>1</sup> In MRC Myeloma IX (MRC-IX) cytogenetic profiling was performed using fluorescence in situ hybridisation (FISH). In NCRI Myeloma XI (NCRI-XI) cytogenetic profiling was performed using Multiplex Ligation-dependent Probe Amplification (MLPA) and quantitative real-time PCR (qRT-PCR) on CD138+ve cells.<sup>2,3</sup>

### Imputation of missing data

The ordinal and continuous variables were imputed using ordinal logistic and multivariable linear regression, respectively. Each imputation model included the other five prognostic factors, sex, overall survival time in months and an indicator as to whether the survival time related to an event (death) or a censored observation.

### Use of the D-statistic

The D-statistic is obtained by regressing the outcome of interest on the rankits associated with the prognostic index (linear predictor) of the risk model. The rankits are derived by first ordering the prognostic index from smallest to largest and then calculating  $\frac{1}{\sqrt{8/\pi}} \Phi^{-1} \left( \frac{i-3/8}{n+1/4} \right)$  for  $i=1$  to  $n$ , where  $n$  represents the sample size used to create the risk model and  $\Phi^{-1}$  the quantile function of the standard normal distribution. The quantile function gives a value at which the probability of the random variable taking that value is less than or equal to the probability stated within the function e.g.  $\Phi^{-1}(0.5) = 0$  as the standard normal is centred at zero. The  $i^{\text{th}}$  rankit then replaces the  $i^{\text{th}}$  largest prognostic index and the rankits used within the regression model.

### Exploratory Analyses

#### *Applicability to other endpoints*

Exploratory analysis examined the MRP groups' relationship to progression-free survival, early mortality, the percentage of protocol dose delivered and quality of life. The survival functions for progression-free survival were estimated using the Kaplan-Meier method and the discrimination assessed using the grouped version of the D-statistic and informally compared to the grouped versions calculated for overall survival. Early mortality was analyzed using a logistic regression model and the area under the receiver operating characteristic curve (AUC) estimated as a measure of discrimination. The percentage of protocol dose delivered and quality of life at baseline were considered descriptively by comparing the relevant distributions across the MRP groups.

#### *Subgroup analysis*

The predictive ability of the MRP groups within subgroups of patients in terms of overall survival was assessed descriptively. The induction treatments (MRC-IX: CTDa and melphalan and prednisone, NCRI-XI: CTDa and CRDa), the consolidation therapy in NCRI-XI (CVD) and the cytogenetic risk groups in both studies (standard risk and high-risk) using the definition of high-risk cytogenetics according to the UK and the IMWG.

Supplementary Figures

Supplementary Figure 1: Combined calibration results at A) sixty days and B) one year.

A)

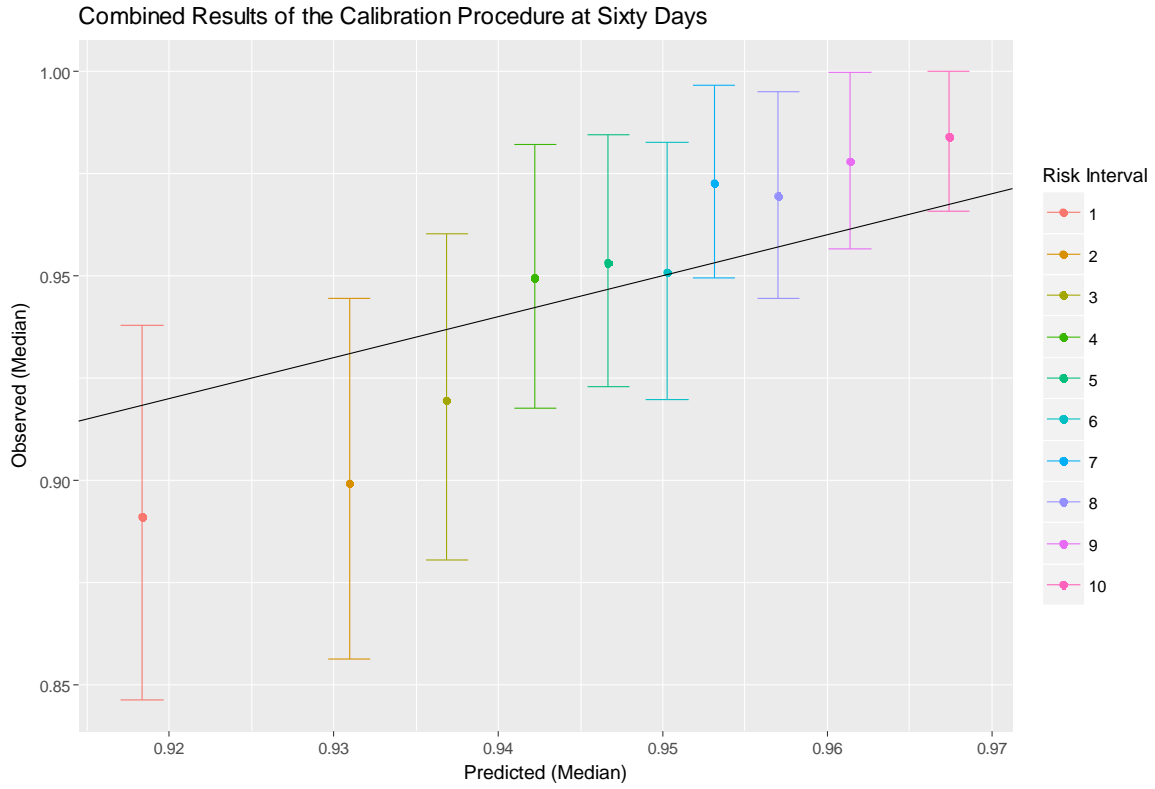

B)

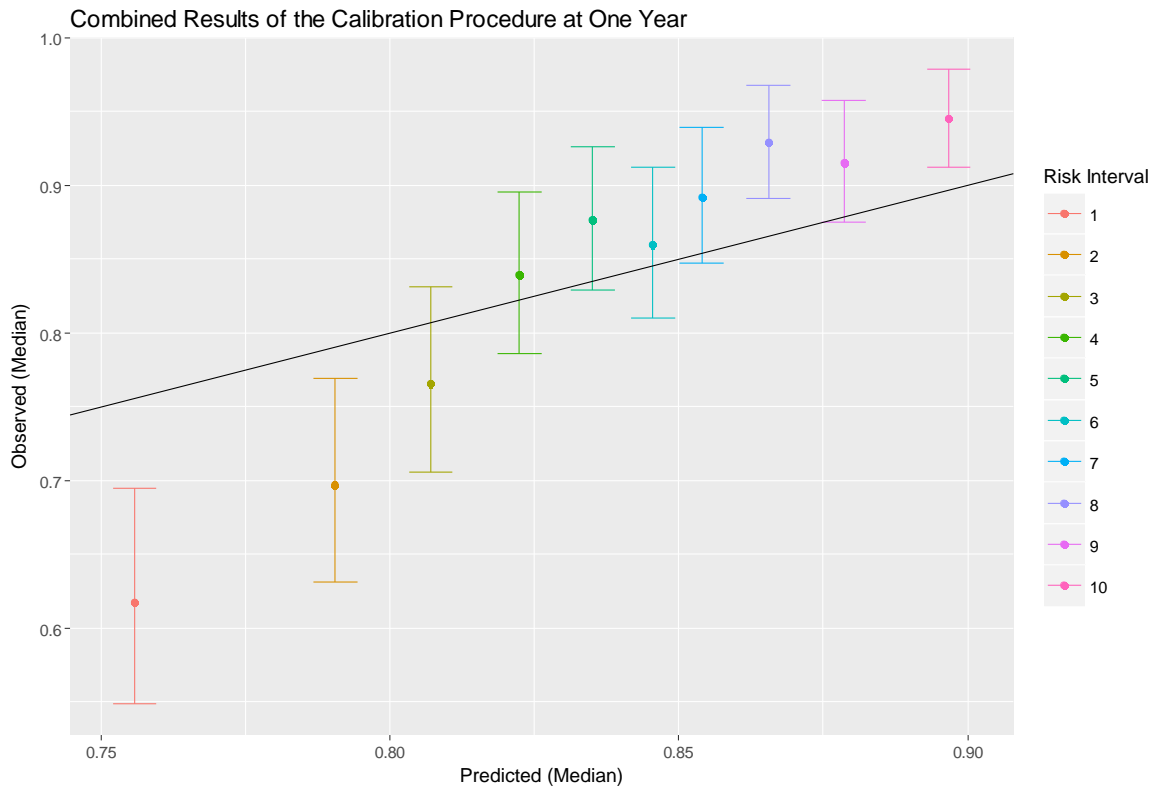

**Supplementary Figure 2: MRP Scoring Algorithm**

1. WHO PS
  - a. Obtain the score associated with the participants WHO Performance Status from the look up table.
2. Age
  - a. Obtain the patients age (in years) at baseline.
  - b. Calculate  $\frac{Age-74.4}{5.40} \times 0.089 = \underline{\hspace{2cm}}$
3. ISS
  - a. Obtain the score associated with the participants ISS stage from the look up table.
4. CRP
  - a. Obtain the patients CRP level (in mg/L) at baseline.
  - b. Calculate  $\frac{\log_e(CRP+1)-2.08}{1.11} \times 0.035 = \underline{\hspace{2cm}}$
5. Overall Score
  - a. Calculate  $1a + 2b + 3a + 4b = \underline{\hspace{2cm}}$
  - b. Categorise the individual into “Fit” “Intermediate-Fitness” or “Frail” using the score obtained in 5a and the MRP categorisation table.

| WHO Performance Status Look Up Table |        |
|--------------------------------------|--------|
| WHO Performance Status               | Score  |
| 0                                    | -0.398 |
| 1                                    | -0.199 |
| 2                                    | 0.000  |
| 3                                    | 0.199  |
| 4                                    | 0.397  |

| ISS Look Up Table |        |
|-------------------|--------|
| Stage             | Score  |
| I                 | -0.212 |
| II                | 0      |
| III               | 0.212  |

| MRP Categorization Table |                               |
|--------------------------|-------------------------------|
| Category                 | Cut-off                       |
| Fit                      | $5a < -0.256$                 |
| Intermediate-Fitness     | $-0.256 \leq 5a \leq -0.0283$ |
| Frail                    | $5a > -0.0283$                |

**Supplementary Figure 3: The distributions of the MRP groups for the remaining Quality of Life subscales of the EORTC QLQ-C30 and QLQ-MY24 in MRC-IX at baseline.**

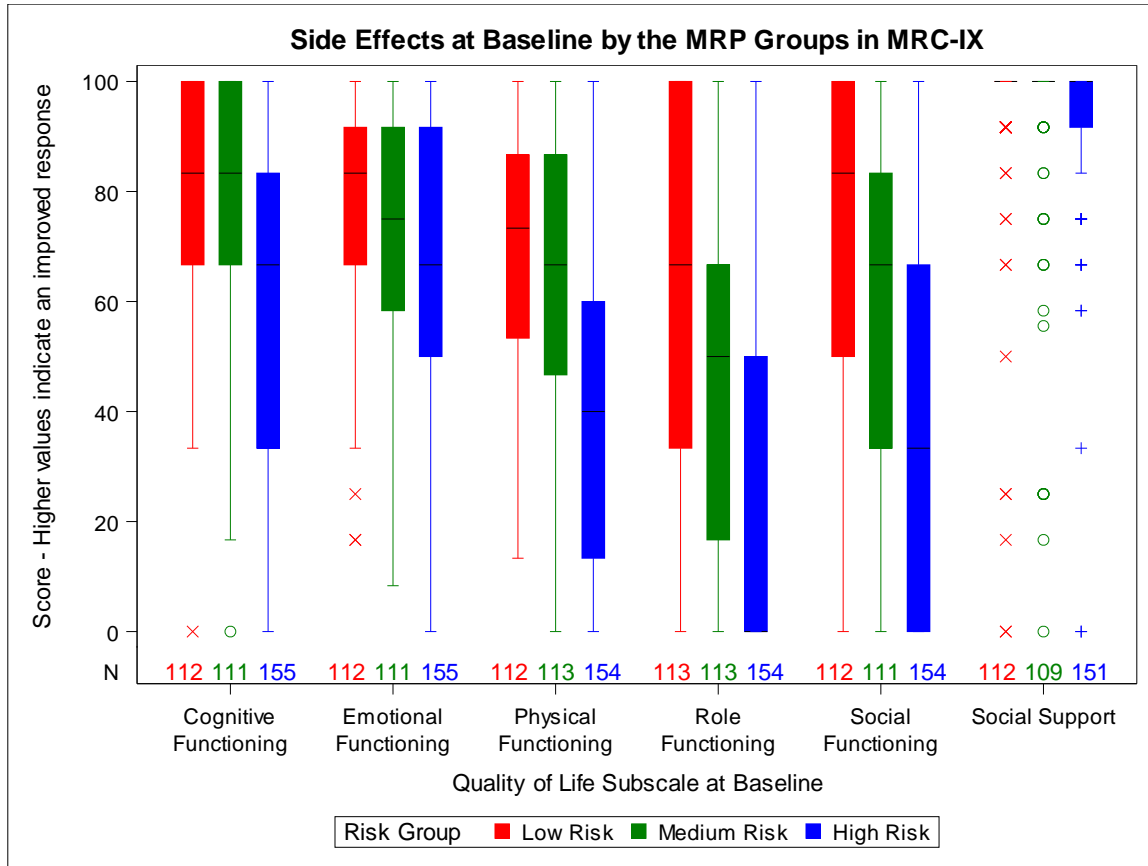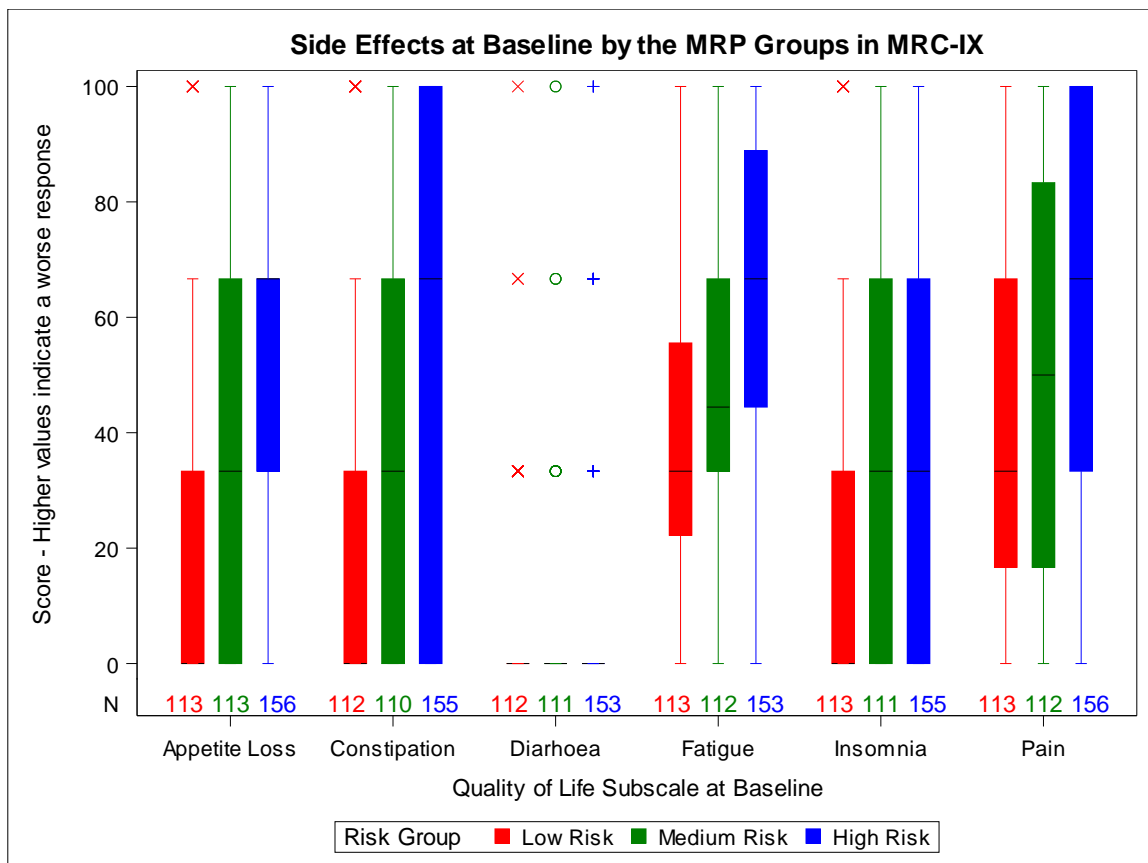

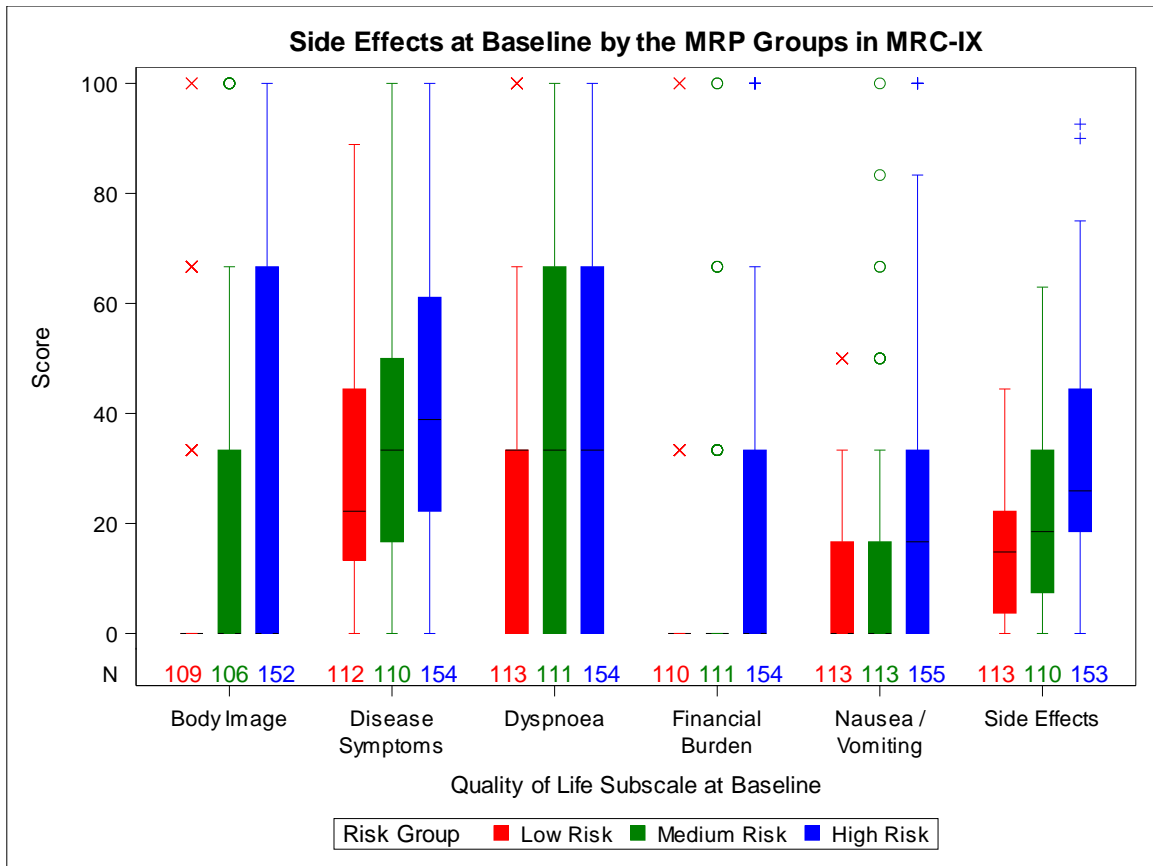

**Supplementary Figure 4: Kaplan-Meier Curves for overall survival (OS) by the MRP groups in MRC-IX with A) Standard (n=169), B) High-Risk (n=120) cytogenetic profiles. Standard risk was defined as the absence of any of the risk lesions; t(4;14), t(14; 16), t(14;20), del(17p) and gain(1q), high-risk at least one risk lesion (UK definition).**

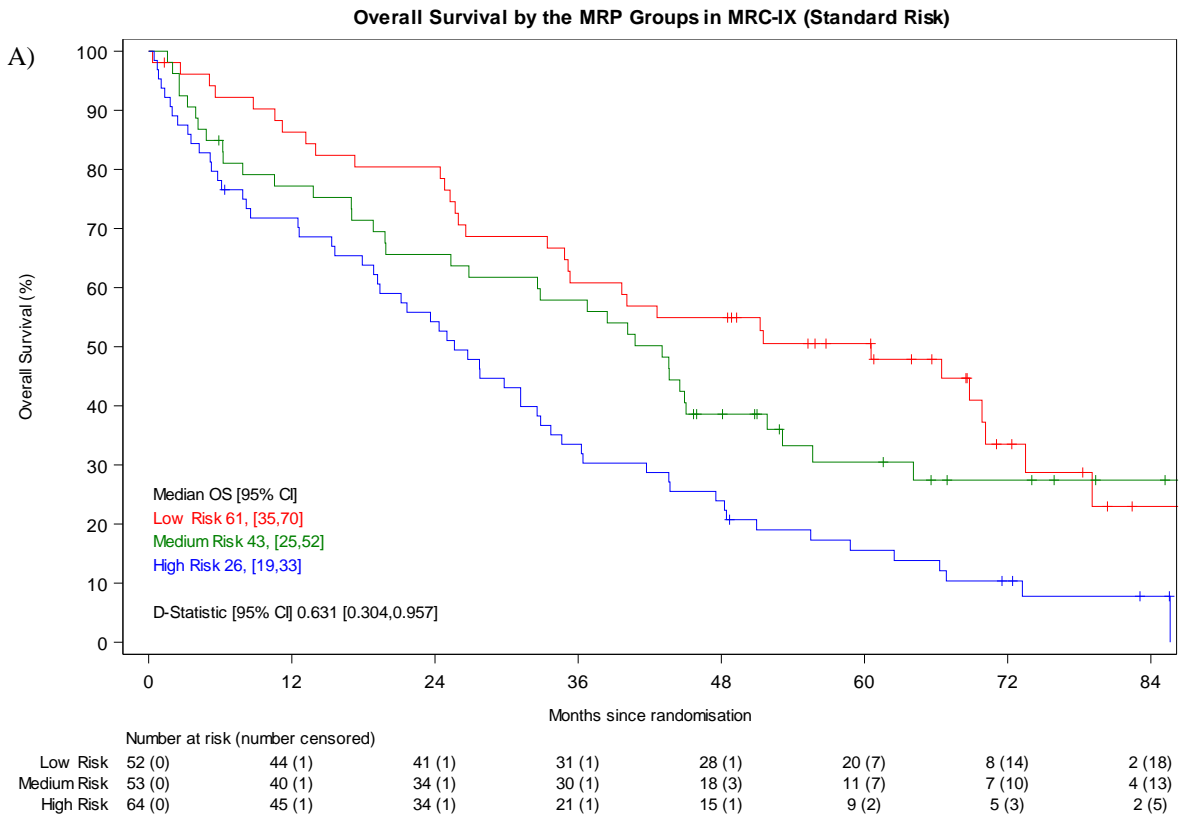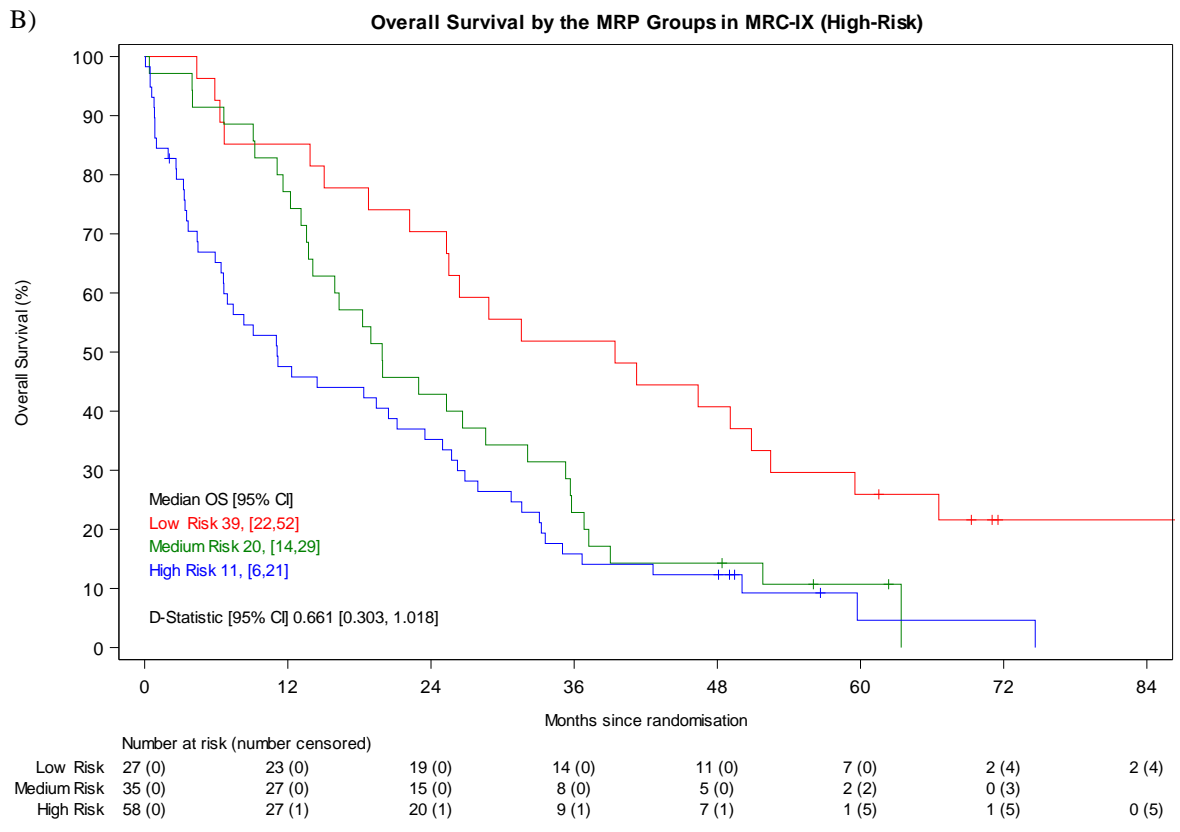



**Supplementary Figure 5: Kaplan-Meier curves for overall survival by the MRP groups for the patients in MRC-IX with A) Standard (n=231), B) High-Risk (n=58) cytogenetic profiles and patients in NCRI-XI with C) Standard (n=598) and D) High-Risk (n=133). Standard risk was defined as the absence of any of the risk lesions; t(4;14), t(14;16), and del(17p) high-risk at least one risk lesion (IMWG definition).**

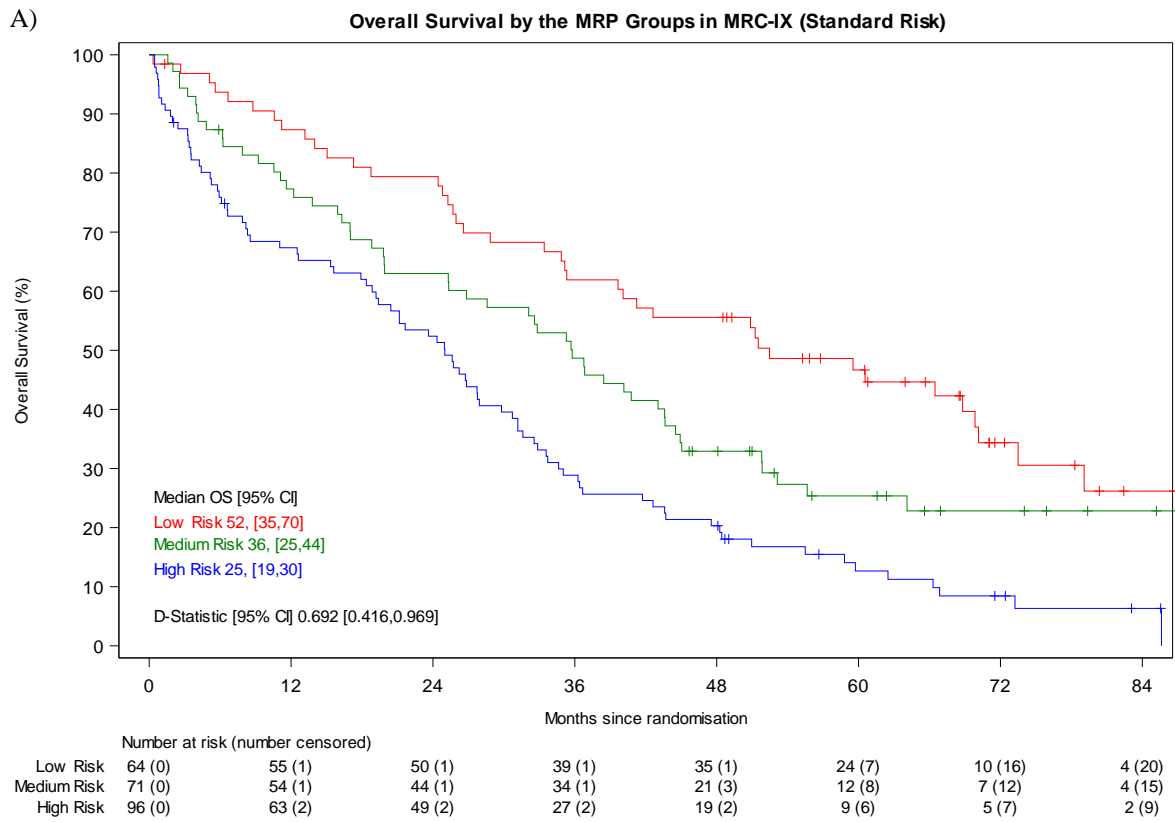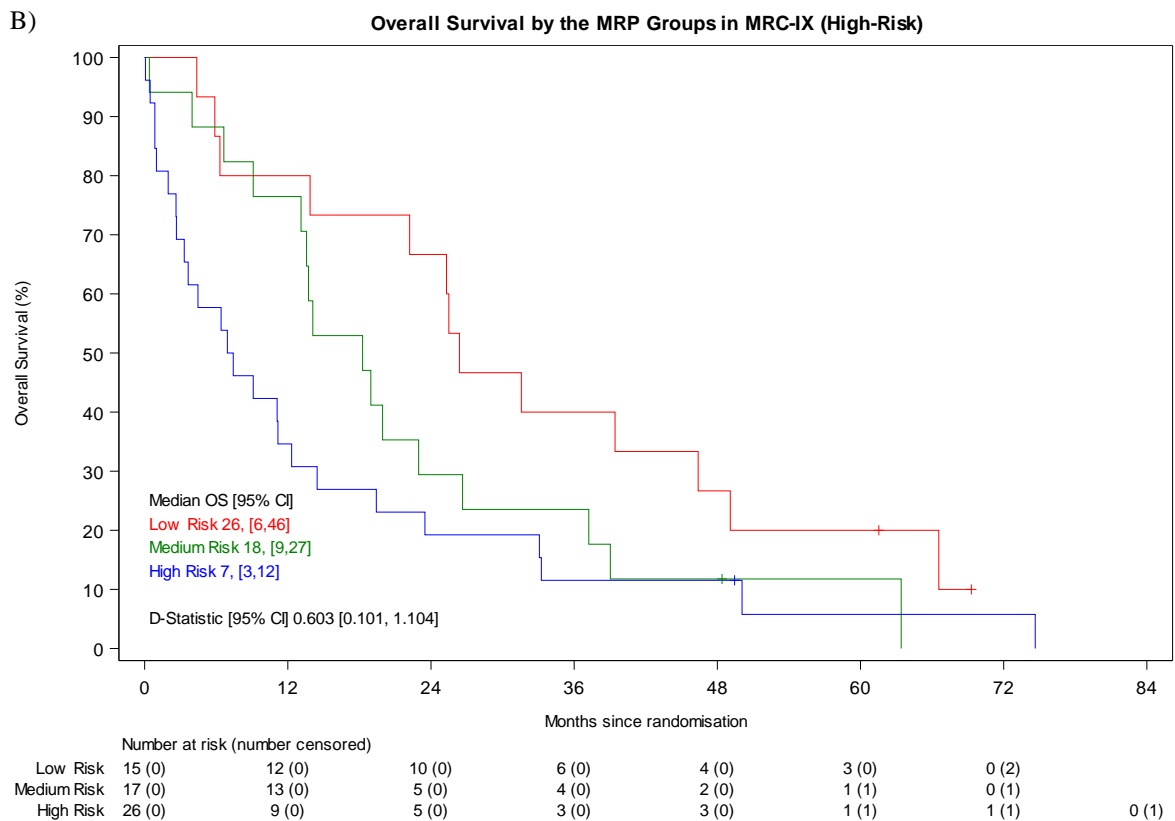

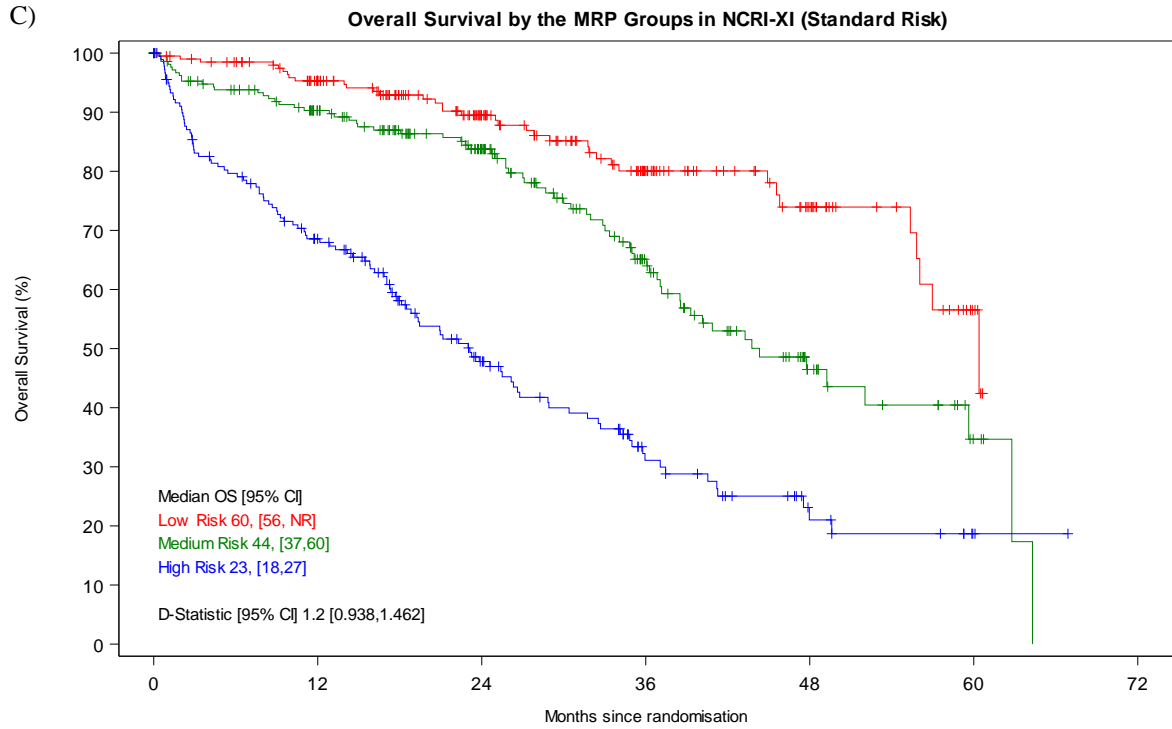

|             | Number at risk (number censored) |          |          |          |          |         |         |
|-------------|----------------------------------|----------|----------|----------|----------|---------|---------|
|             | 0                                | 12       | 24       | 36       | 48       | 60      | 72      |
| Low Risk    | 201 (0)                          | 167 (25) | 113 (70) | 62 (111) | 30 (140) | 6 (160) | 0 (165) |
| Medium Risk | 215 (3)                          | 169 (26) | 114 (70) | 58 (105) | 20 (129) | 4 (142) | 0 (144) |
| High Risk   | 182 (1)                          | 112 (15) | 60 (37)  | 27 (52)  | 10 (62)  | 2 (69)  | 0 (71)  |

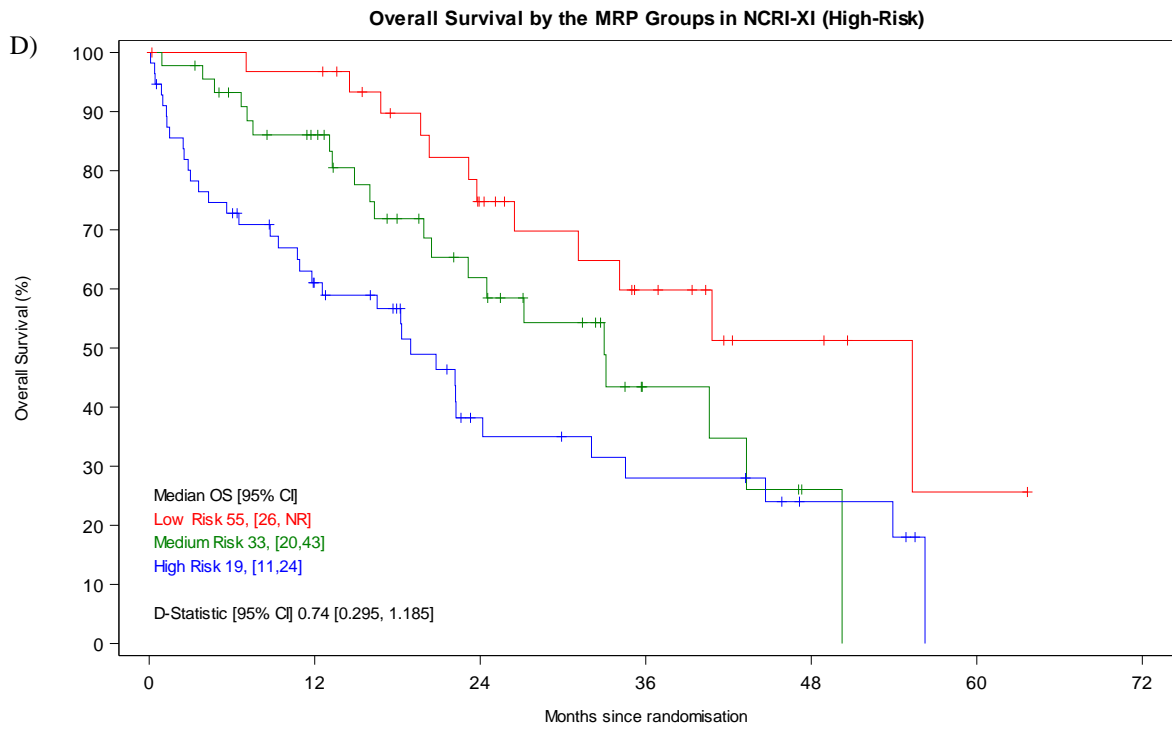

|             | Number at risk (number censored) |        |         |         |        |        |        |
|-------------|----------------------------------|--------|---------|---------|--------|--------|--------|
|             | 0                                | 12     | 24      | 36      | 48     | 60     | 72     |
| Low Risk    | 32 (0)                           | 30 (1) | 18 (7)  | 10 (12) | 4 (17) | 1 (19) | 0 (20) |
| Medium Risk | 45 (0)                           | 33 (6) | 18 (13) | 5 (22)  | 1 (24) | 0 (24) | 0 (24) |
| High Risk   | 56 (0)                           | 29 (6) | 12 (14) | 8 (15)  | 4 (18) | 0 (20) | 0 (20) |

## Supplementary Tables

**Supplementary Table 1: Distribution of each potential prognostic factor across the MRP groups in the training (NCRI-XI) and test (MRC-IX) datasets.**

|                                 |              | NCRI-XI: Training Dataset |                     |                     | MRC-IX: Test Dataset |                      |                       |
|---------------------------------|--------------|---------------------------|---------------------|---------------------|----------------------|----------------------|-----------------------|
|                                 |              | Low Risk (N=617)          | Medium Risk (N=618) | High Risk (N=617)   | Low Risk (N=142)     | Medium Risk (N=150)  | High Risk (N=228)     |
| L:W Ratio                       | Median (IQR) | 0.294 (0.216,0.389)       | 0.286 (0.204,0.371) | 0.233 (0.163,0.317) | 0.296 (0.239, 0.371) | 0.282 (0.207, 0.345) | 0.245 (0.162, 0.328)  |
|                                 | Missing      | 0                         | 4                   | 3                   | 0                    | 1                    | 1                     |
| Age                             | Median (IQR) | 72 (69,76)                | 75 (71,77)          | 77 (73,80)          | 70 (67, 73)          | 73 (70, 76)          | 75 (72, 78)           |
| CRP (mg/L)                      | Median (IQR) | 4 (2,6.2)                 | 5 (2.625,11.980)    | 12 (5,31)           | 5 (3,8.75)           | 7 (4.05, 11.82)      | 14.5 (5, 37.17)       |
|                                 | Missing      | 98                        | 96                  | 68                  | 0                    | 0                    | 0                     |
| LDH (IU/L)                      | Median (IQR) | 270 (182,317)             | 273 (191, 381.5)    | 296 (197,425.5)     | 316.5 (239.8, 409.5) | 340 (253.0, 416.0)   | 329.50 (242.5, 434.2) |
|                                 | Missing      | 128                       | 138                 | 150                 | 46                   | 45                   | 68                    |
| WHO Performance Status<br>N (%) | 0            | 354 (57.4)                | 118 (19.1)          | 6 (1)               | 67 (47.2)            | 26 (17.3)            | 0                     |
|                                 | 1            | 218 (35.3)                | 365 (59.1)          | 227 (36.8)          | 68 (47.9)            | 102 (68)             | 68 (29.8)             |
|                                 | 2            | 18 (2.9)                  | 85 (13.8)           | 239 (38.7)          | 7 (4.9)              | 21 (14)              | 83 (36.4)             |
|                                 | 3            | 0                         | 4 (0.6)             | 106 (17.2)          | 0                    | 1 (0.7)              | 67 (29.4)             |
|                                 | 4            | 0                         | 0                   | 11 (1.8)            | 0                    | 0                    | 10 (4.4)              |
|                                 | Missing      | 27 (4.4)                  | 46 (7.4)            | 28 (4.5)            | 0                    | 0                    | 0                     |
| ISS<br>N (%)                    | I            | 269 (43.6)                | 39 (6.3)            | 10 (1.6)            | 54 (38.0)            | 10 (6.7)             | 4 (1.8)               |
|                                 | II           | 277 (44.9)                | 307 (49.7)          | 147 (23.8)          | 76 (53.5)            | 76 (50.7)            | 63 (27.6)             |
|                                 | III          | 36 (5.8)                  | 209 (33.8)          | 414 (67.1)          | 12 (8.5)             | 64 (42.7)            | 161 (70.6)            |
|                                 | Missing      | 35 (5.7)                  | 63 (10.2)           | 46 (7.5)            | 0                    | 0                    | 0                     |

CRP: C-reactive protein, ISS: International Staging System, IQR: Interquartile range, L:W Ratio: ratio of lymphocytes to total white cells, LDH: Lactate dehydrogenase, .  
Note that due to the inclusion criteria for the test dataset, only individuals with Age, CRP, WHO Performance Status and ISS recorded were included in the test dataset.

**Supplementary Table 2: Logistic regression models for early mortality**

|                            | NCRI-XI: Training Dataset |                 |               | MRC-IX: Test Dataset |                 |               |
|----------------------------|---------------------------|-----------------|---------------|----------------------|-----------------|---------------|
|                            | Estimate (SE)             | Odds ratio (SE) | 95% CI for OR | Estimate (SE)        | Odds ratio (SE) | 95% CI for OR |
| Low Risk (Reference level) | -4.01 (0.30)              |                 |               | -4.25 (0.71)         |                 |               |
| Medium Risk                | 0.76 (0.37)               | 2.14 (1.45)     | (1.04, 4.42)  | 0.65 (0.87)          | 1.92 (2.39)     | (0.35, 10.54) |
| High Risk                  | 1.56 (0.34)               | 4.76 (1.40)     | (2.44, 9.27)  | 2.36 (0.74)          | 10.59 (2.10)    | (2.48, 45.17) |

OR: odds ratio

## References

1. Chiecchio L, Protheroe R, Ibrahim A, et al: Deletion of chromosome 13 detected by conventional cytogenetics is a critical prognostic factor in myeloma. *Leukemia* 20:1610, 2006
2. Boyle EM, Proszek PZ, Kaiser MF, et al: A molecular diagnostic approach able to detect the recurrent genetic prognostic factors typical of presenting myeloma. *Genes, Chromosomes and Cancer* 54:91-98, 2015
3. Kaiser M, Walker B, Hockley S, et al: A TC classification-based predictor for multiple myeloma using multiplexed real-time quantitative PCR. *Leukemia* 27:1754, 2013
